# Supplementary material
Source: PubMed Central journal article supplement (PMC5599354)
Supplement: NIHMS897142-supplement.pdf [file NIHMS897142-supplement.pdf]

## Supplemental Information

### Supplemental Figures

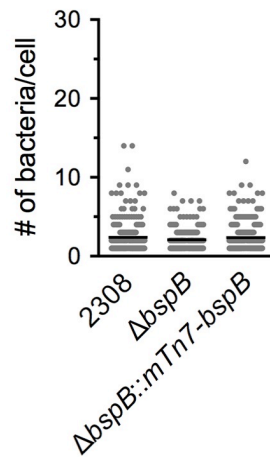

**Figure S1. Comparable uptake of *Brucella* strains in BMMs. Related to Figure 1.**

BMMs were infected with various DsRed<sub>m</sub>-expressing *B. abortus* strains for 4 h and numbers of bacteria/cell were counted via fluorescence microscopy. Lines indicate means from 3 independent experiments.

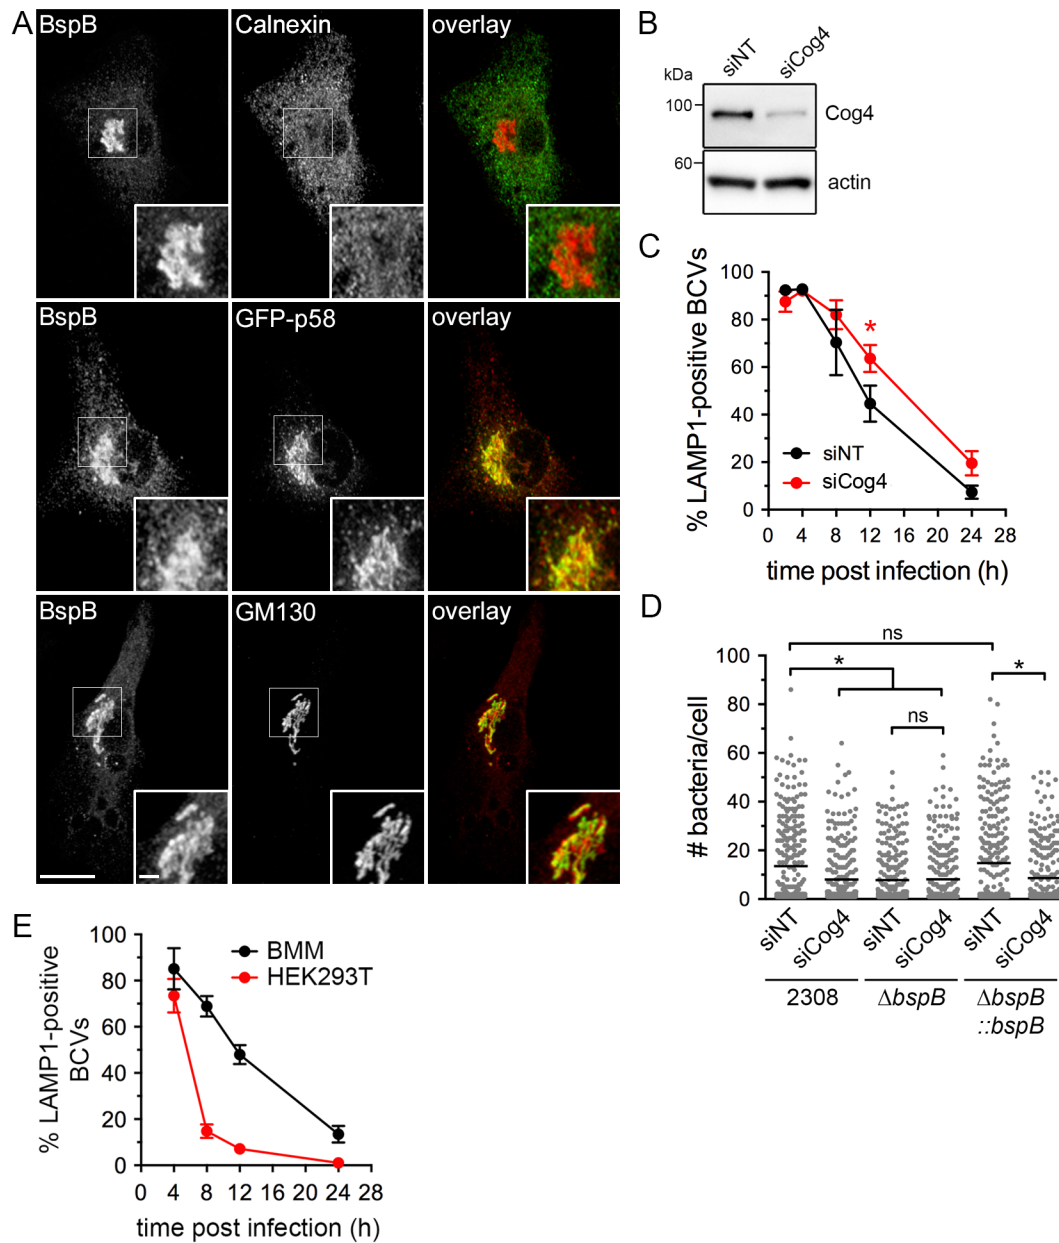

**Figure S2. Golgi targeting of BspB in BMMs, role of Cog4 in rBCV biogenesis and bacterial replication and accelerated rBCV biogenesis in HEK293T cells. Related to Figure 3.**

(A) Representative confocal micrographs of BMMs transduced to express HA-BspB for 24 h. HA-BspB (red) localization to the ER (calnexin), the ERGIC (GFP-p58) and the Golgi apparatus (GM130) are shown. Scale bars, 10  $\mu$ m and 2  $\mu$ m (insets).

(B) Representative Western blot analysis of Cog4 depletion in BMMs upon siRNA nucleofection, compared to non-targeting (siNT) siRNA treatment.  $\beta$ -actin was used as loading control.

(C) BCV remodeling in BMMs treated with either siNT or siCog4 siRNAs for 72 h prior to infection with *B. abortus* 2308::mTn7-DsRed<sub>m</sub>. Data are means  $\pm$  SD from 3 independent experiments. Asterisks indicate statistically significant differences compared to siNT control as determined by a two-way ANOVA followed by Bonferroni's multiple comparisons test ( $P < 0.05$ ).

(D) *Brucella* replication in BMMs treated with either siNT or siCog4 siRNAs for 72 h prior to infection with DsRed<sub>m</sub>-expressing *B. abortus* wild type (2308),  $\Delta$ bspB, or complemented  $\Delta$ bspB *B. abortus* strains for 24 h. Lines indicate from 3 independent experiments. Asterisks indicate statistically significant differences compared to untreated control determined by a Kruskal-Wallis test with Dunn's multiple comparisons test ( $P < 0.05$ ). ns, not significant.

(E) BMMs and HEK293T cells were infected with *B. abortus* 2308::mTn7-DsRed<sub>m</sub>, processed at various times post infection for immunostaining of LAMP1, and LAMP1-positive BCVs were scored by fluorescence microscopy. Data are means  $\pm$  SD from 3 independent experiments.

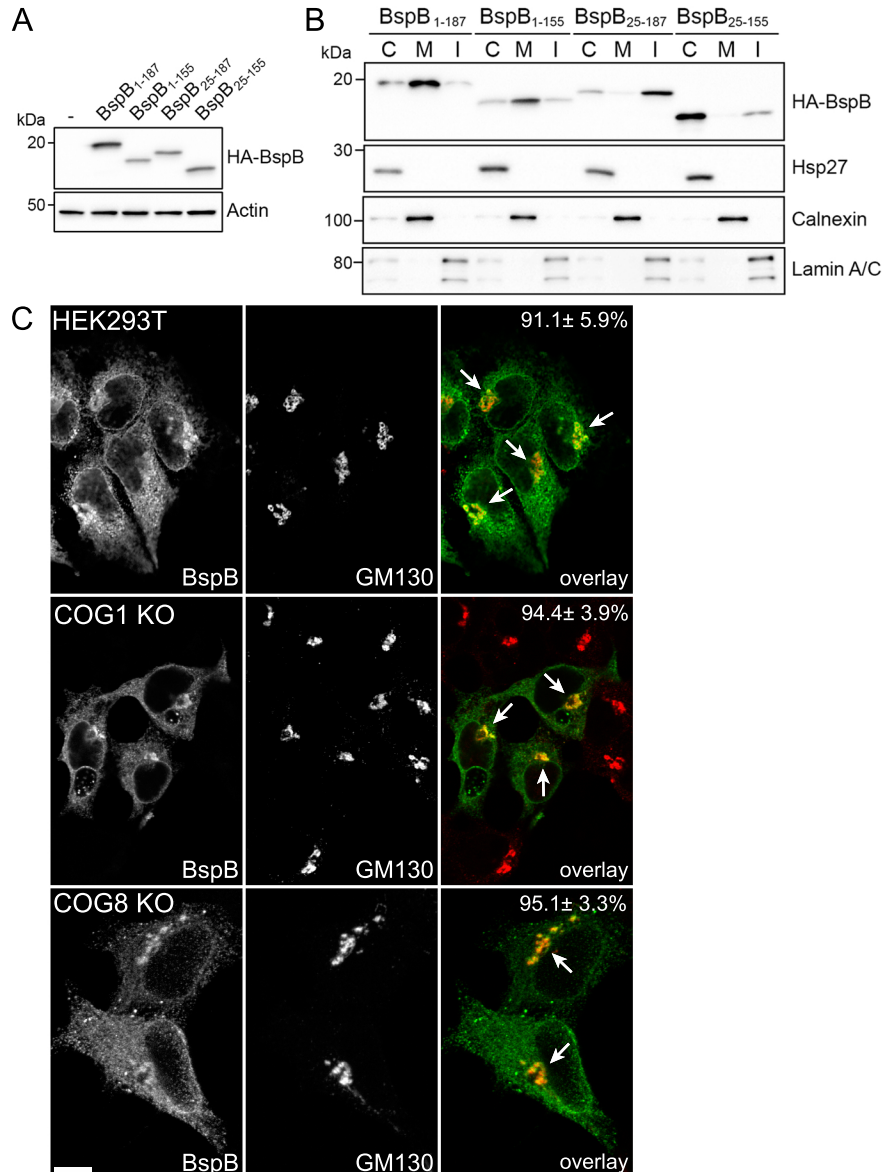

**Figure S3. BspB subcellular fractionation and Golgi targeting in wild type, COG1 and COG8 KO HEK293T cells. Related to Figure 4**

(A) Representative Western blot analysis of HA-BspB truncations production in HeLa cells after 18h of transfection. (-) refers to cells transfected with empty vector pCMV-HA.  $\beta$ -actin was used as a loading control.

(B) Detergent-based subcellular fractionation of HeLa cells expressing either HA-BspB<sub>1-187</sub>, HA-BspB<sub>1-155</sub>, HA-BspB<sub>25-187</sub>, or HA-BspB<sub>25-155</sub> into saponin-soluble cytosolic (C),

Triton X-100-soluble membrane (M) and insoluble (I) fractions. Western blots were probed with either anti-BspB, anti-Hsp27 (cytosolic marker), anti-calnexin (membrane marker) and anti-Lamin A/C (nuclear insoluble marker) antibodies.

(C) Representative confocal micrographs of wild type, COG1 and COG8 KO HEK293T cells transfected with pCMV-HA-*bspB* for 24 h and immunostained for GM130 (red) and HA-BspB (green). Arrows indicate Golgi targeting of BspB in all transfected cells. Numbers indicate the percentage of cells where BspB localized to GM130-positive structures (mean  $\pm$  SD). Scale bar, 10  $\mu$ m.

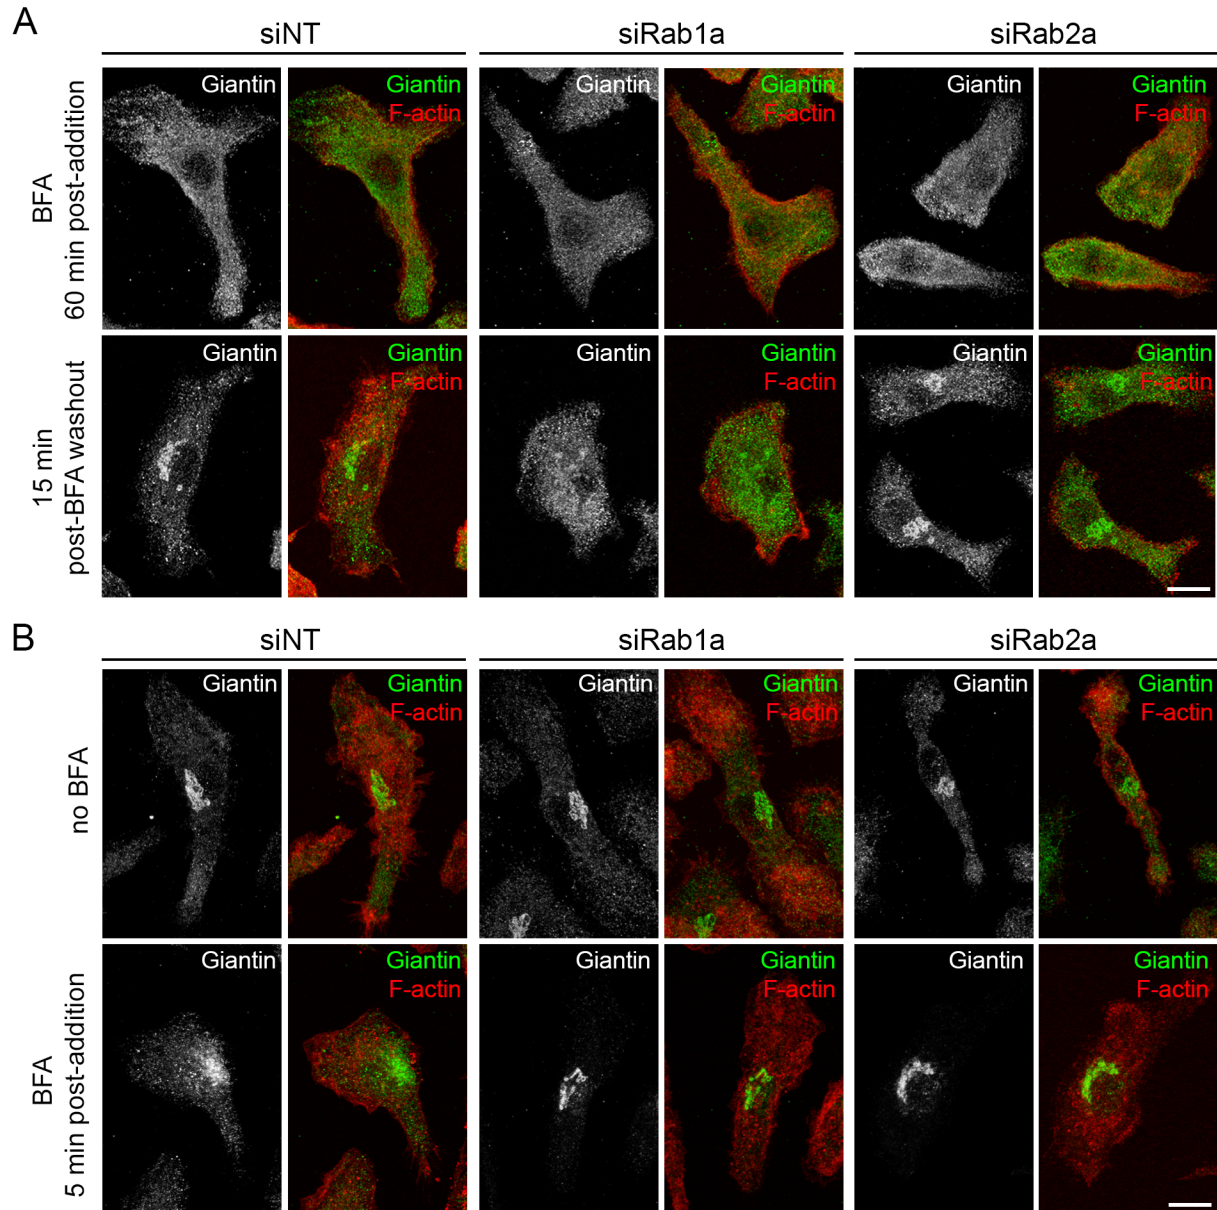

**Figure S4. Effects of Rab1a and Rab2a siRNA-mediated depletions on anterograde and retrograde secretory transport in BMMs. Related to Figure 5.**

(A) BMMs were either treated with siNT, siRab1a or siRab2a siRNAs for 72 h, then treated for 60 min with 5  $\mu$ g/ml BFA to induce redistribution to the ER of the Golgi protein Giantin (upper panels). BFA was washed out and BMMs were processed after 15 min for Giantin immuno-staining (lower panels). F-actin staining using phalloidin was

used to delineate cell shapes. Rab1a depletion blocked anterograde transport of Giantin back to Golgi membranes after BFA washout. Scale bars, 10  $\mu$ m

(B) BMMs were either treated with siNT, siRab1a or siRab2a siRNAs for 72 h (upper panels), then treated with 5  $\mu$ g/ml BFA for 5 min to induce redistribution to the ER of the Golgi protein Giantin via retrograde transport. BMMs were processed for Giantin immuno-staining (lower panels). F-actin staining using phalloidin was used to delineate cell shapes. Rab1a and Rab2a depletions impaired retrograde transport of Giantin upon addition of BFA. Scale bars, 10  $\mu$ m

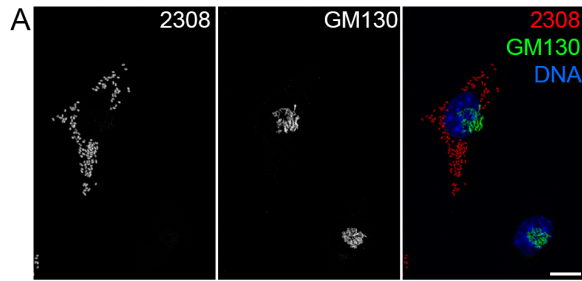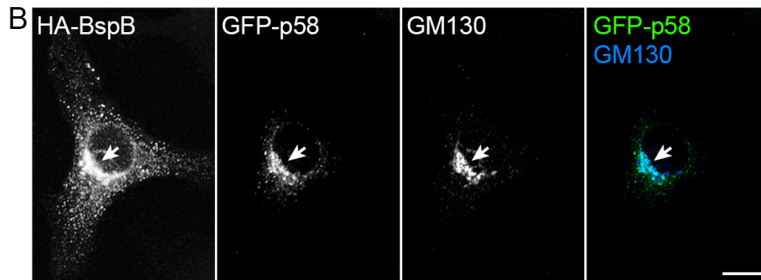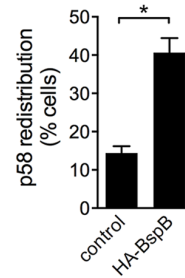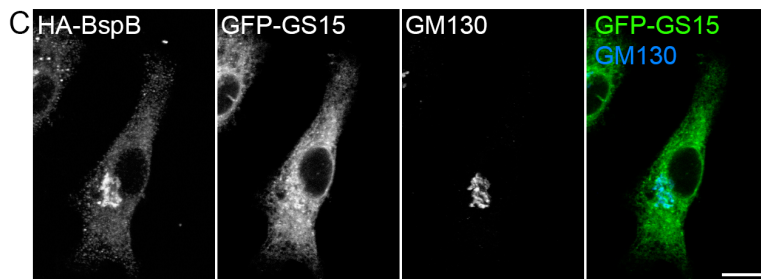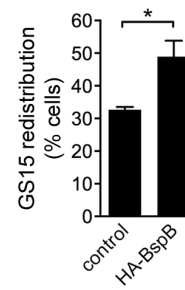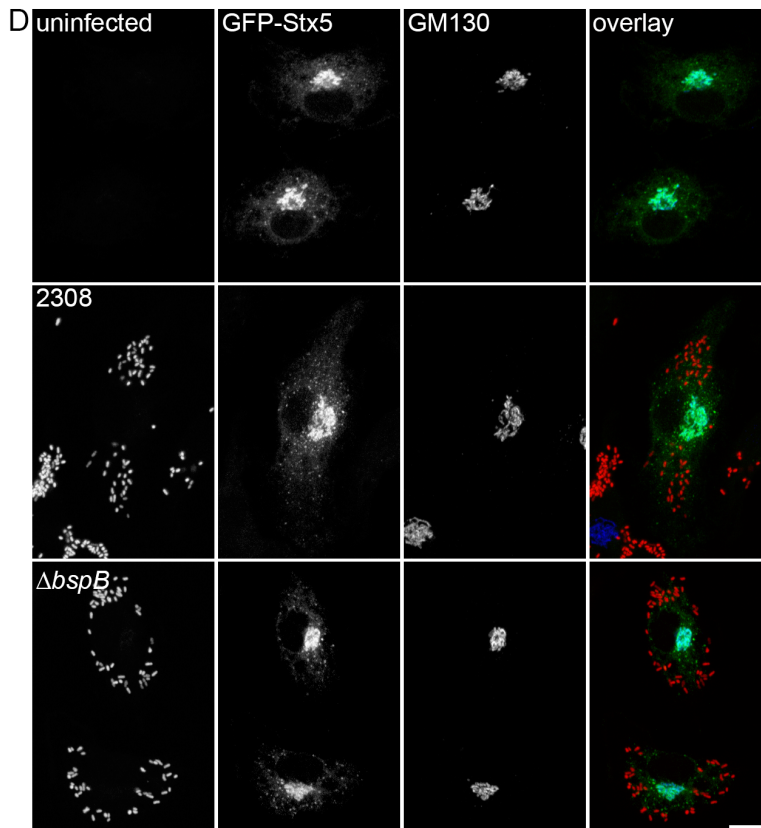



**Figure S5. Effect of *Brucella* infections or ectopically expressed BspB on the cellular distribution of the ERGIC and the Golgi SNAREs GS15 and Syntaxin5 in BMMs. Related to Figure 6**

(A) Representative confocal micrographs of BMMs infected with wild type *B. abortus* 2308::mTn7-*DsRed<sub>m</sub>* (red) for 24 h, and immuno-stained for the Golgi marker GM130 (green). BMM DNA nuclei were labelled using Hoechst 33342 (Thermo Fisher Scientific). Scale bar, 10  $\mu$ m

(B) Representative confocal micrographs of BMMs expressing GFP-p58 and HA-BspB via retroviral transduction for 24 h, and immuno-stained for the Golgi marker GM130. Scale bar, 10  $\mu$ m. Quantification of GFP-p58 redistribution in BMMs expressing or not (control) HA-BspB. Data are means  $\pm$  SD from 3 independent experiments. Asterisk indicates statistical significant differences compared to control BMMs, as determined by an unpaired two-tailed *t* test ( $P < 0.05$ ).

(C) Representative confocal micrographs of BMMs expressing GFP-GS15 and HA-BspB via retroviral transduction for 24 h, and immuno-stained for the Golgi marker GM130. Scale bar, 10  $\mu$ m. Quantification of GFP-GS15 redistribution in BMMs expressing or not (control) HA-BspB. Data are means  $\pm$  SD from 3 independent experiments. Asterisk indicates statistical significant differences compared to control BMMs, as determined by an unpaired two-tailed *t* test ( $P < 0.05$ ).

(D) Representative confocal micrographs of BMMs expressing GFP-GS15 via retroviral transduction for 24 h, left uninfected or infected with either *B. abortus* 2308 or  $\Delta$ *bspB* bacteria for 24 h, and immuno-stained for the Golgi marker GM130. Scale bar, 10  $\mu$ m.

**Table S1: Oligonucleotides used in this study. Related to the STAR Methods section**

| Oligonucleotides                                                                                               |                    |     |
|----------------------------------------------------------------------------------------------------------------|--------------------|-----|
| RC603-miniTn7K-dsRed Forward: 5'-ATCATCCTCATCACCGACAA-3'                                                       | Myeni et al., 2013 | N/A |
| RC604-miniTn7K-dsRed Reverse: 5'-GCTATATTCTGGCGAGCGAT-3'                                                       | Myeni et al., 2013 | N/A |
| WSU0003- <i>bspB</i> Forward <i>EcoRI</i> : 5'-CCGGAATTCGGCGCCCCGTTCTTTTCCTG-3'                                | This paper         | N/A |
| WSU0004- <i>bspB</i> <sub>25</sub> Forward <i>EcoRI</i> : 5'-CCGGAATTCGGCACTTCACCGGAAGCGAGATCG-3'              | This paper         | N/A |
| WSU0005- <i>bspB</i> Reverse <i>XhoI</i> : 5'-CCGACTCGAGTTATGTTTGGGGGCGGCGAAGG-3'                              | This paper         | N/A |
| WSU0006- <i>bspB</i> <sub>155</sub> Reverse <i>XhoI</i> : 5'-CCGACTCGAGTTACGCACCGCGGCGCAGCACAAG-3'             | This paper         | N/A |
| WSU0203- <i>bspB</i> Tn7K <i>EcoRI</i> Forward: 5'-AGCTCGAATTCGGATTGCTTCGTCACCGATTTG-3'                        | This paper         | N/A |
| WSU0204- <i>bspB</i> Tn7K <i>KpnI</i> Reverse: 5'-AAGGTACCTTATGTTTGGGGGCGGCGAAG-3')                            | This paper         | N/A |
| WSU0247-EGFP Forward <i>EcoRI</i> : 5'-TAGCGGAATTCGTCGCCACCATGGTGAGC-3'                                        | This paper         | N/A |
| WSU0249-EGFP Forward <i>BamHI</i> : 5'-CGGGATCCGTCGCCACCATGGTGAGC-3'                                           | This paper         | N/A |
| WSU0255-Rab2a Reverse <i>BamHI</i> : 5'-CGGGATCCCGTTGGGCAGCTAGACAG-3'                                          | This paper         | N/A |
| WSU0262-Mutagenesis Rab1a Q70L Forward: 5'-TGGGACACAGCAGGCCTGGAAAGATTTCAACAA TCAC-3'                           | This paper         | N/A |
| WSU0263-Mutagenesis Rab1a Q70L Reverse: 5'-GTGATTGTTTCGAAATCTTTCCAGGCCTGCTGTGT CCA-3'                          | This paper         | N/A |
| WSU0265-Rab1a Reverse <i>BamHI</i> : 5'-CGGGATCCTTAGCAGCAACCTCCACC-3'                                          | This paper         | N/A |
| WSU0298-Rab1a Forward <i>SacI</i> : 5'-ACCGAGCTCGCGATATGTCCAGCATGAATCCCG-3'                                    | This paper         | N/A |
| WSU0301- <i>bspB</i> Reverse <i>BamHI</i> stop: 5'-CGGGATCCTTATGTTTGGGGGCGGCGAAGG-3'                           | This paper         | N/A |
| WSU0302- <i>bspB</i> <sub>155</sub> Reverse <i>BamHI</i> stop: 5'-CGGGATCCTTACGCACCGCGGCGCAGCACAAG-3'          | This paper         | N/A |
| WSU0303- <i>bspB</i> Forward Kozak <i>EcoRI</i> : 5'-CCGGAATTCAGCATGGGACGCCCGTTCTTTTCCT G-3'                   | This paper         | N/A |
| WSU0304- <i>bspB</i> <sub>25</sub> Forward Kozak <i>EcoRI</i> : 5'-CCGGAATTCAGCATGGGACACTTCACCGGAAGCGA GATC-3' | This paper         | N/A |
| WSU0305-Rab2a Forward <i>XhoI</i> : 5'-GGCCTCGAGCCATGGCGTACGCCTATCTC-3'                                        | This paper         | N/A |
| WSU0350-pEGFP N1 Reverse <i>BamHI</i> : 5'-CGCGGATCCGCTTACTTGTACAGCTCGTCCATG-3'                                | This paper         | N/A |
| WSU0353-pEGFP C1 Reverse: 5'-TGATCAGTTATCTAGATCCGGTGG-3'                                                       | This paper         | N/A |
| WSU0354-pEGFP C1 Forward <i>ClaI</i> : 5'-TAATATCGATGCCACCATGGTG-3'                                            | This paper         | N/A |
